RESEARCH ARTICLE

# NGO Partnerships in Using Ecotourism for Conservation: Systematic Review and Meta-Analysis

Tania P. Romero-Brito<sup>1</sup>, Ralf C. Buckley<sup>1,2\*</sup>, Jason Byrne<sup>1</sup>

**1** Griffith School of Environment, Griffith University, Gold Coast, Queensland, Australia, **2** International Chair in Ecotourism Research, Griffith University, Gold Coast, Queensland, Australia

\* [r.buckley@griffith.edu.au](mailto:r.buckley@griffith.edu.au)

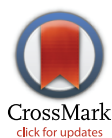

## OPEN ACCESS

**Citation:** Romero-Brito TP, Buckley RC, Byrne J (2016) NGO Partnerships in Using Ecotourism for Conservation: Systematic Review and Meta-Analysis. PLoS ONE 11(11): e0166919. doi:10.1371/journal.pone.0166919

**Editor:** Elissa Z. Cameron, University of Tasmania, AUSTRALIA

**Received:** March 2, 2016

**Accepted:** November 7, 2016

**Published:** November 28, 2016

**Copyright:** © 2016 Romero-Brito et al. This is an open access article distributed under the terms of the [Creative Commons Attribution License](https://creativecommons.org/licenses/by/4.0/), which permits unrestricted use, distribution, and reproduction in any medium, provided the original author and source are credited.

**Data Availability Statement:** All relevant data are within the paper and its Supporting Information files.

**Funding:** The authors received no specific funding for this work.

**Competing Interests:** The authors have declared that no competing interests exist.

## Abstract

We analyse 214 cases worldwide where non-governmental organisations (NGOs) use ecotourism for conservation. Other stakeholders in these initiatives include local communities, the private sector, and government agencies. Stakeholder relationships determine NGO roles and project management structures and governance. We classified cases into 10 structural categories based on the initiating stakeholder and the NGO role, and used these categories to analyze geographic patterns and success factors. Most of the 214 cases are community-based (~170; 79%); most are in developing countries (190; 89%); and most are in protected areas (196; 91%). Frequencies of structural categories differ between continents. More cases in Latin America and Asia are initiated by NGOs and local communities, and more in Africa by the private sector. Case-study authors used a range of economic, socio-cultural and environmental criteria to judge whether projects were successful. At global scale, we found no significant association between project success and the involvement of private tourism entrepreneurs. Projects involving either local or international NGOs had higher success rates than those that involved both simultaneously. Future research could adopt political ecology approaches to examine: the factors that lead NGOs to adopt ecotourism enterprises; their internal decision-making processes and strategies; their interactions with the stakeholders involved; and their conservation goals and outcomes.

## 1. Introduction

The conservation of biological diversity is urgent, insufficient, and underfunded [1–12]. Practical conservation involves social as well as natural sciences, and multiple stakeholders including private, community and non-government organisations (NGOs) as well as government and multilateral agencies [13–19]. Amongst these stakeholders, NGOs are assuming an increasingly important role, through: formal and informal political lobbying; buying or covenanted land for conservation; and forming partnerships to undertake specific conservation projects [19–30]. Establishing conservation-oriented ecotourism enterprises is one such approach. These enterprises aim to switch land and resource use from consumption to

conservation, and to resist external threats such as large-scale land use change associated with primary industries [31–33]. This approach requires that non-profit NGOs, and their project partners, must operate within the competitive commercial tourism sector.

Relationship between stakeholders are often complex, and partnership arrangements influence governance, management and outcomes of projects [29, 30, 34, 35]. NGOs use different approaches and strategies, with different outcomes, in developed and developing countries respectively [31, 32, 36–47]. Some analysts have argued that NGOs have successfully used ecotourism as a local conservation tool, either by operating tours, influencing the management of protected areas, or raising local awareness [24, 32, 33, 36, 43, 48–53]. Other authors, however, have concluded that NGOs may be driven more by global discourses, such as those related to poverty alleviation, development, conservation, equity, and the role of non-state organisations; and that they may prioritize their own agendas over local communities and conservation needs [54–57]. Overall, it appears that NGO actions and strategies are determined partly by historical, environmental and legislative contexts in the countries, cultures and communities concerned; and partly by the internal history and structure of each NGO as an organization [25–28, 31, 32, 40, 42, 46, 58–60].

Many authors, for example, have suggested that NGOs in developed countries preferentially operate ecotourism enterprises themselves, or form partnerships with government agencies in tourism policy and management for protected areas [24, 40–42, 49, 51–53]. In developing countries, in contrast, ecotourism approaches by NGOs commonly combine nature conservation and poverty alleviation, often in challenging political circumstances. Tactics include the establishment of community-based ecotourism projects [22, 32, 59, 60], and campaigns to promote social awareness or create social pressure to halt unsustainable developments [33, 36, 43, 50, 56, 58, 61].

None of these previous studies have conducted a global comparative analysis of approaches and outcomes at the scale of individual case studies. Here, therefore, we present a systematic worldwide review of published NGO-based ecotourism projects. The overall question addressed is: where, how, and how well do these projects operate? Specific questions examined are as follows. 1. How many NGO-based ecotourism projects are currently operational worldwide? 2. Where do they operate? 3. What stakeholders are involved? 4. Which stakeholder initiated each project? 5. What is the role of the NGO in each case? 6. What internal governance structure has each adopted to manage interactions between stakeholders? 7. How successful, or otherwise, has each project proved? 8. What specific environmental, social and economic outcomes have they achieved? 9. What factors have contributed to the success or failure of each? 10. What lessons can be learned for future NGO-based ecotourism projects?

We also test three specific predictions derived from previous published literature, as follows. Prediction 1. There are continental-scale patterns in the design, structure and operational parameters of ecotourism projects, creating “regional signatures” which reflect the different histories of land tenure and management, and past tourism patterns such as safaris in Africa and outfitters in North America (37). Prediction 2. The proportion of ecotourism projects which are successful is higher for those which are initiated or controlled by a private sector partner, because of business experience and commercial connections with the tourism industry [23, 34, 60, 62–65]. Prediction 3. The proportion of ecotourism projects which are successful is higher for those that include both international and local-scale NGOs, since international NGOs can generally mobilise more funds, broader expertise, and greater political power, whereas local NGOs generally have greater knowledge of local circumstances, and better connections and rapport with local communities and other stakeholders [32, 66–70].

## 2. Methods

### 2.1 PRISMA Protocol and additional analyses

We adopted the standard requirements of systematic reviews as specified by PRISMA [71]. Our methods are fully described below, and there is no additional methodological protocol [72]. The PRISMA checklist is attached (S1 Table), and the flowchart is provided as Fig 1. Under item 16 of the PRISMA protocol, Additional Analyses, we added three components as below, relating respectively to sources, data and analysis.

Regarding sources, the PRISMA protocols provide for a series of successive screening steps, but then treat all selected publications as of equal weight. Here, however, we distinguished three sets of sources, providing different levels of detail, and hence contributing differentially to each individual research question as outlined above. Regarding data, the PRISMA protocols are designed primarily for quantitative data, whereas we included both quantitative and qualitative information, derived from analysis of text. Regarding analysis, the PRISMA protocols assume a single-stage analysis of the final set of publications which survive the screening processes. In this analysis, however, we adopted a two-stage approach. First, we used qualitative data, extracted from some of the sources, to generate a new structural classification of cases. This classification constitutes the first result of our analysis. We then used the categories in this classification as an additional parameter for quantitative analysis of cases from all sources.

### 2.2 Searches, sources and information extracted

Our sources were derived as follows. We searched the refereed published literature between May 2012 and June 2015 using standard academic search engines including Web of Science<sup>®</sup>, Google Scholar<sup>®</sup> and Science Direct<sup>®</sup>. We used search terms ‘ecotourism’, ‘community-based tourism’, ‘conservation tourism’, ‘sustainable tourism’, ‘venture tourism’, ‘voluntourism’ and ‘cultural tourism’, in Boolean combination with ‘non-governmental organisation’, ‘civil association’, and ‘non-profit organisation’. We tracked citations both forwards and backwards.

We included only peer-reviewed journal articles, books, and book chapters, published in English or Spanish. We examined the geographic distribution of the studies identified, as an outcome-level check against possible bias through language of publication, and we examined the academic journals and disciplines where each case study was published, as an outcome level check against possible bias associated with different academic disciplines.

Our data were extracted as follows. For each individually identifiable case study, we extracted information on: (i) the specified objectives of each study; (ii) the research methodologies adopted; (iii) the principal country concerned; (iv) whether or not each ecotourism initiative took place within a protected area; (v) the declared aims and implementation date of each project; (vi) the type and scale of the NGOs involved; (vii) any other stakeholders involved, and their roles; (viii) the NGO goals, roles and rationales for adopting ecotourism strategies; (ix) the specific outcomes of each project as described by each study’s authors; and (x) whether or not these authors considered each project to be successful, and why. Most of these data are thus qualitative, categorical or dichotomous. We examined frequencies of different categories as an outcome-level check against possible bias towards reporting only projects considered successful.

### 2.3 Coding, compression and categorisation

Most of the cases considered in this meta-analysis were published in social science journals, as outlined below in the first section of the Results. They presented their objectives and methods

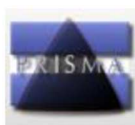

## PRISMA 2009 Flow Diagram

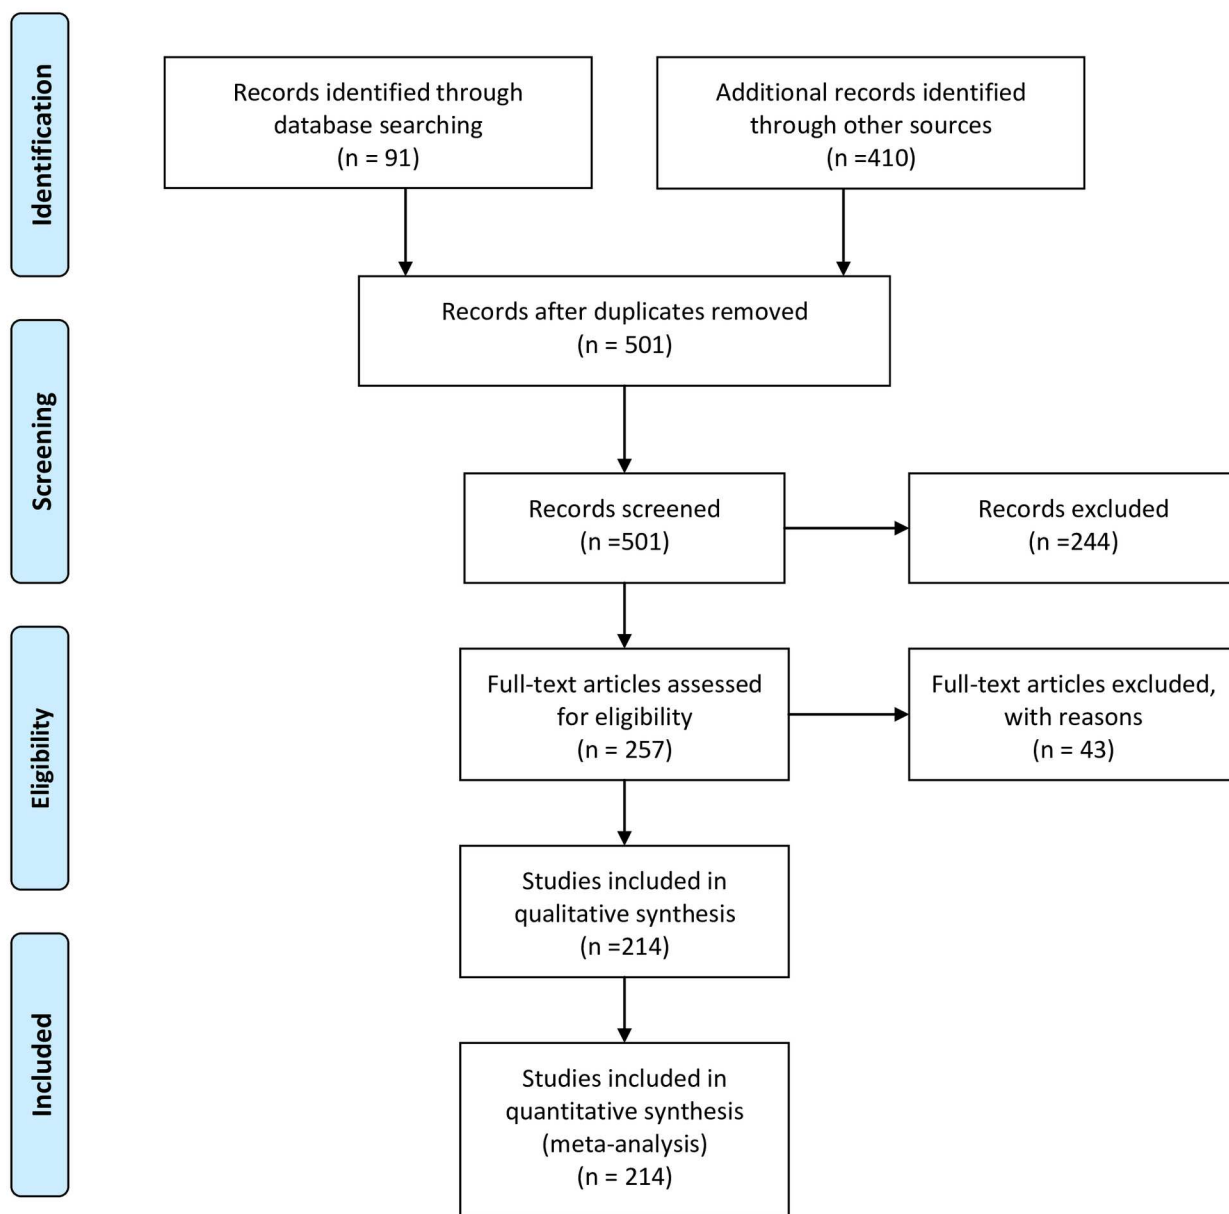

**Fig 1. PRISMA Flowchart.** From: Moher D, Liberati A, Tetzlaff J, Altman DG, The PRISMA Group (2009). Preferred Reporting Items for Systematic Reviews and Meta-Analyses: The PRISMA Statement. PLoS Med 6(7): e1000097. doi:10.1371/journal.pmed1000097 For more information, visit [www.prisma-statement.org](http://www.prisma-statement.org).

doi:10.1371/journal.pone.0166919.g001

(information types (i) and (ii) in the preceding paragraph), and also their findings, in textual rather than numerical form. To conduct this review, we therefore used a combination of qualitative and quantitative approaches, to simplify the data structure sufficiently for statistical analysis, without losing the richer degree of detail contained in text presentations.

Qualitative analysis extracts distinct and identifiable concepts from a set of text, and iteratively builds a hierarchical pyramid of constructs. This approach requires that all the text analysed addresses the same issues, so that the lowest-level concepts can be linked into higher-level constructs. Of the ten sets of data extracted from each case analysed here, some represent logically linked concepts, which can be incorporated in the same qualitative analysis. Others, however, are logically independent of each other, so their associations can only be considered in a statistical sense. For example, there may be a statistical association between the success or failure of each project, data item (x) above, and the country where it took place, item (iii), but there is no logical qualitative hierarchy between them.

To conduct statistical meta-analysis of patterns, we therefore converted coded concepts, which are philosophically part of a qualitative analytical approach, to statistical categories, which are philosophically part of a quantitative approach. For some of the types of information extracted from each case, this conversion is straightforward. For example, text specifying where each case study was conducted can be coded as inside or outside a protected area, and this can be converted unambiguously to a dichotomous variable. Similarly, location text can be coded as developed or developing nation, which converts unambiguously to a second dichotomous variable. It can also be coded as a country name, which converts unambiguously to a categorical “continent” variable. Conversion from country to continent is unambiguous, but involves substantial data compression.

For information of types (v) to (vii) above, we adopted a combined data compression approach, using several sets of case-study information simultaneously in order to generate a categorical classification of case studies. The details are set out in the next section. This created a new, derived, categorical variable for each case study, which we refer to as structural classification type, and which we then used in subsequent statistical analysis. We also used a qualitative approach to identify the various rationales used by NGOs for adopting ecotourism as a conservation tool, item (viii) above.

Finally, for information of types (ix) and (x) above, we used a qualitative approach to identify how individual case-study authors described case-study outcomes, and how they judged the success or failure of each of the projects concerned. We also converted the highest-level construct for item (x), project success or failure as judged by case-study authors, to a dichotomous variable for use in statistical analysis. We did not attempt to re-interpret the judgements of case-study authors, firstly since we did not have their direct experience of the projects concerned, and secondly since the various published studies did not all have the same aims or employ the same criteria.

## 2.4 Structural classification

We developed the structural classification through standard iterative qualitative analysis of text [73, 74], obtained by searching each source publication for information on how projects were established, structured, developed and operated. We used this information to identify the stakeholders involved, the roles adopted by each, and the ways in which each project was initiated, controlled, governed and managed. This yielded a matrix of [cases] x [stakeholder roles and interactions]. We then simplified the structure of this information set iteratively, by simultaneously grouping and re-grouping both the cases and the stakeholder parameters, so as to generate a classification of cases into structural categories. We continued this process until no further amalgamations were possible without loss of significant information discriminating between categories. This classification was not available *a priori*, but is derived as part of our analysis, and is therefore presented below in the Results.

This process yielded 10 structural categories, with distinctions between categories reflecting only two of the case parameters: the stakeholder that initiated the project, and the role adopted by the NGO. We were therefore able to define each category using fixed combinations of those two factual criteria. That is, we initially derived or identified the categories using an iterative qualitative procedure, which involves ambiguities; but we ultimately defined the categories using objective criteria, which are unambiguous. These combinations and definitions are also derived as part of our analyses, and are therefore presented below in the Results.

We assigned each of the individual cases to one of these structural categories, and used those categories as an additional parameter for further analyses. For 37% of cases, the allocation of cases to categories was carried out independently by the first two authors, and then compared so as to calculate an inter-coder reliability rate, ICRR. Since the final criteria used to define the categories are unambiguous, the ICRR for these cases was 100%.

## 2.5 Statistical tests

To address the questions predictions outlined earlier, we tested for associations between the categorical variables for each case study, including the additional variable derived from the structural classification. We used Fisher's Exact Test for all tests of associations, two-tailed except where otherwise stated. Since all the parameters are categorical, parametric statistical techniques are not applicable.

## 3. Results

### 3.1 Presentation of findings

We present our findings under seven headings, as follows. (i) Summary of data sources and screening using a PRISMA flowchart. (ii) Structural classification of cases, based on stakeholder involvement and roles adopted, and project initiation and governance. (iii) Rationales advanced by NGOs for taking part in ecotourism projects. (iv) Social, economic and environmental outcomes of each case study, and the mechanisms by which these outcomes were achieved, focussing on quantifiable conservation outcomes where these are available. (v) Criteria used by case study authors to evaluate success or failure of each project, and the underlying reasons where provided. (vi) Country-by-country geographic distribution of case studies, and test for associations with protected areas, level of development, and structural category. (vii). Associations between success or failure, and other variables.

### 3.2 Sources and screening

We identified source materials in three categories. The first category ([S2 Table](#)) comprises 34 refereed journal articles and books, which do not present detailed information on individual cases, but provide critical context for detailed meta-analysis of case studies [[22–25](#), [27–36](#), [40–43](#), [46](#), [48–60](#), [65](#)]. The second category ([S3 Table](#)) consists of 50 refereed journal articles and books, which each focus specifically on one or more individual case studies, 57 cases in all [[26](#), [44](#), [45](#), [64](#), [75–121](#)]. The third category comprises three books which compile previously published case studies in ecotourism [[37](#), [38](#), [47](#)]. These compendia include ~410 individual cases in total, of which 200 (48%) involve NGOs, and 157 include sufficient information to be incorporated in this analysis ([S4 Table](#)). Combining all three sources, we identified 257 cases in all, of which 214 cases were usable. The PRISMA flowchart for this process is provided as [Fig 1](#).

The journal articles and books analysed were published in three main disciplines: tourism (55 articles, 65.4%), ecology (9 articles, 10.7%), and geography (4 articles, 4.7%). The rest were published in fields such as conservation and biodiversity, ornithology, forestry, human



ecology, policy, social development, interdisciplinary fields, anthropology, rural studies, and education: >40 different journals in all. A wide range of quantitative and qualitative methods were adopted in these studies, including surveys, interviews, participant observation, ethnographic approaches, focus groups, discourse analysis, case studies, content analysis, narrative opinions and mixed approaches.

### 3.3 Structural classification and NGO roles

The iterative qualitative analysis used to derive the structural classification yielded four key simplification steps or insights. The first of these is that the cases can be classified using a matrix of stakeholder type vs stakeholder roles. Four stakeholder types can be distinguished: government agencies, private operators, local communities, and NGOs. The second is that the roles adopted by three of these four stakeholder types are largely consistent across cases, whereas the NGO stakeholders adopt a range of roles which produce different consequences for project structure. Ten NGO roles are distinguishable: lobbyist or promoter, landowner or land manager, champion, ongoing manager, founding manager, certifier, advisor or facilitator, networker, broker, and consultant. The third step is that the single most influential aspect of stakeholder roles, in determining subsequent structure and governance, is which stakeholder originally initiated the project. We therefore reduced the classification to a matrix of initiating-stakeholder vs NGO-role. The fourth and final step is that of the numerous theoretically possible combinations of initiating stakeholder and NGO role, only 10 actually occur in practice. This iterative process thus successfully allocated the 214 individual cases into 10 structural categories, summarised in Table 1. The number of cases differs considerably between categories, from 1 to 63. The intercoder reliability rate was 100% for the 79 cases (37%) classified independently by the first two authors.

There are six categories where the NGO is the initiator, and four where it is not. In projects initiated by other stakeholders, NGO involvement can occur either at the request of that

**Table 1. Structural categories.**

| Category | Initiator             | NGO role              | NGO actions                                                                                                                                                                                          | No. of cases <sup>a</sup> |
|----------|-----------------------|-----------------------|------------------------------------------------------------------------------------------------------------------------------------------------------------------------------------------------------|---------------------------|
| 1        | NGO                   | Lobbyist / Promoter   | Promotes ecotourism through campaigns, code of conducts, protests, marketing, environmental education and policy making                                                                              | 6                         |
| 2        | NGO                   | Land owner or manager | Manages and safeguards an entire protected area, private or public, and incorporates tourism components                                                                                              | 19                        |
| 3        | NGO                   | Champion              | Principal driver of community-based ecotourism (CBET) projects                                                                                                                                       | 63                        |
| 4        | NGO                   | Ongoing manager       | Operates its own tours, mostly associated with scientific research for conservation                                                                                                                  | 15                        |
| 5        | NGO                   | Founding manager      | Operates its own tours initially, but intending to hand over management to a local community once established                                                                                        | 10                        |
| 6        | NGO                   | Certifier             | Creates certification, awards, and monitoring mechanisms for ecotourism ventures and hotels                                                                                                          | 1                         |
| 7        | Local community       | Advisor / facilitator | Assists and advises in the creation or re-organization of CBET projects.                                                                                                                             | 31                        |
| 8        | Local community       | Networker             | Links various existing CBET projects together and with other stakeholders, e.g., local government and private tour operators, and/or assists them with promotion strategies. Umbrella organisations. | 15                        |
| 9        | Private tour operator | Broker                | Supports ecotourism enterprises carried out by private tour operators that supports conservation and social initiatives, and may link them with local communities and/or government                  | 36                        |
| 10       | Government            | Consultant            | Assists local governments in the design and/or execution of ecotourism projects                                                                                                                      | 7                         |

<sup>a</sup> n = 203 cases; for 11 cases, the role of the NGO was not clear.

stakeholder, or through the proactive initiative of the NGO. In categories 1–6, where the NGO is the initiator, NGOs exercise principal control over the project management structure. These categories are distinguished by the role played by the NGO as (1) lobbyist or promoter, (2) land owner or land manager, (3) champion, (4) ongoing manager, (5) founding manager, or (6) certifier. In categories 7–10, projects are initiated and generally also managed by other stakeholders, with NGOs playing secondary roles. In categories 7 and 8, the local community is the initiator. In category 7, the NGO acts as advisor or facilitator. In category 8, the NGO acts as a networker across multiple projects. Category 9 consists of projects initiated by private tour operators, where the NGO acts as a broker to other stakeholders. Category 10 consists of projects initiated by a government agency, where the NGO acts as a consultant.

Globally, the most frequent category (63 cases, 29.4%) is category 3, where the NGO champions its own initiatives. The second most frequent (36, 16.8%) is category 9, where projects are initiated by private-sector partners. The third (31, 14.4%) is category 7, where the NGO acts as advisor and facilitator for projects initiated by local communities. Overall, ~170 of the 214 case studies (~79%) involved community-based ecotourism, but only 46 of these (27%) were initiated by the communities concerned.

Different NGOs preferentially adopt different roles, depending on their profiles, aims and expertise. The role of the NGO can evolve during the course of an individual project: for example, where the NGO acts initially as consultant to a government agency (category 10), but later as champion of the initiative itself (category 3). An NGO may adopt multiple simultaneous roles in the same project: e.g., both as broker (category 9) linking a private operator with local landowners or government, and simultaneously as lobbyist (category 1) for the entire initiative. An NGO may adopt multiple roles in different contemporaneous projects: e.g., as founding manager (category 5) in one project, and advisor or facilitator (category 7) in another.

### 3.4 NGO rationales for adopting ecotourism

From the 57 individual cases described in detail (S3 Table), five initial reasons were identified for NGOs to engage in ecotourism projects. For 14 cases (24.5%), ecotourism projects formed part of a deliberate overarching strategic plan for the NGO concerned, aiming to gain financial and political support for conservation of species and areas. This rationale is most frequent for areas managed directly by the relevant NGO. In six cases (10.5%), the NGO used ecotourism as a conservation strategy to mitigate the environmental impacts of natural disasters such as hurricanes, or external environmental threats such as mining or very large-scale tourism development. In a further six cases (10.5%), the NGO became involved in order to support an ecotourism project initiated by a private business, local community or individual champion that claimed to promote conservation. In six cases (10.5%), the NGO became involved in order to control visitor impacts, after an area of high conservation value became well-known as a tourism destination. For 12 cases (21%), NGOs adopted conservation tourism strategies primarily as a low-impact economic alternative for local communities. In some of these cases, previous industries based on exploiting local natural resources had collapsed through over-exploitation; in some, natural resources had become unavailable through declaration of a new protected area; and in some, there were simply no other resources available for extraction. For 13 cases (22.8%), reasons for NGO engagement in ecotourism were not specified.

### 3.5 Evaluation of outcomes

Case-study authors adopted a wide range of different measures to assess project outcomes: e.g., profits, visitation rates, social benefits, conservation consequences, or changes in



environmental policies. Some authors showed that projects may yield social benefits, even where they fail to achieve conservation goals [107, 113]. Some showed that projects may improve the local sense of ownership and environmental awareness, even if they fail to deliver expected economic returns [85, 96, 97, 99].

Few of these case studies, however (S3 Table), quantified the conservation outcomes of NGO-based ecotourism projects accurately or precisely [57, 81, 83, 85, 93–96, 99, 105, 106, 120, 122, 123]. Four mechanisms were identified. Some projects provided direct economic support for reforestation, sustainable agriculture and fishing, garbage collection, and conservation campaigns or lobbying. Some funded wildlife monitoring or patrols in protected areas. Some supported environmental education programs for visitors or residents. A few halted extraction of natural resources from protected areas, by providing an alternative non-extractive livelihood. Case study authors gave little information on the mechanisms used by NGOs to allocate ecotourism profits to conservation efforts, the sums involved, or the tangible conservation gains achieved.

### 3.6 Criteria for success or failure

Criteria put forward by the case-study authors as evidence of project success or failure are summarised in Table 2. They include economic, environmental and sociocultural indicators. For projects judged as successful, case study authors mentioned: economic criteria such as income for local residents; environmental criteria such as support for conservation initiatives, increased conservation awareness, or overcoming conservation threats; and sociocultural criteria such as increased capacity, new skills, increased quality of life, recreational options, social cohesion, political empowerment, protection of culture, and gender equity.

Where case study authors judged projects as unsuccessful, they commonly cited sociocultural criteria such as conflicts and violence, disorganization and lack of trust, resentment and frustration, prostitution and drug abuse, and damage to local traditions. The projects concerned generated little income or livelihood improvement. Reasons cited include: lack of a competitive tourism attraction; inadequate tourist access and infrastructure; poor marketing and management; and poor quality services provided. Some of these projects hampered

**Table 2. Criteria used by case-study authors to judge project success or failure.**

|                      | Positive benefits                                                                                                                                                                                                                                                                                                                                     | Negative impacts                                                                                                                                                                                                                                                                       |
|----------------------|-------------------------------------------------------------------------------------------------------------------------------------------------------------------------------------------------------------------------------------------------------------------------------------------------------------------------------------------------------|----------------------------------------------------------------------------------------------------------------------------------------------------------------------------------------------------------------------------------------------------------------------------------------|
| <b>Economic</b>      | <ul style="list-style-type: none"> <li>• Employment</li> <li>• Economic diversification</li> <li>• Sale of other local products</li> <li>• Economy dependent on ecotourism</li> <li>• Creation of savings, loans, pensions, and other economic compensation</li> </ul>                                                                                | <ul style="list-style-type: none"> <li>• Any income and employment small, insubstantial</li> <li>• Only a few inhabitants gain, creating economic inequities</li> <li>• Economic inflation</li> </ul>                                                                                  |
| <b>Environmental</b> | <ul style="list-style-type: none"> <li>• Support for other conservation initiatives</li> <li>• Resources monitoring</li> <li>• Promotion of environmental education, increased awareness</li> <li>• Halt to uncontrolled development</li> </ul>                                                                                                       | <ul style="list-style-type: none"> <li>• Exploitation of natural resources through livestock grazing, farming, timber cutting, poaching, hunting, or fisheries; often due to lack of immediate economic benefits from ecotourism</li> <li>• Pollution and ecological damage</li> </ul> |
| <b>Sociocultural</b> | <ul style="list-style-type: none"> <li>• Increased capacity, training, new skills, new experiences</li> <li>• Increased quality of life via new infrastructure and services</li> <li>• Promotion of ownership, social cohesion, broader community vision, political effectiveness</li> <li>• Protection of culture and promotion of equity</li> </ul> | <ul style="list-style-type: none"> <li>• Traditions affected</li> <li>• Domestic violence, where men object to involvement of women in projects</li> <li>• Feelings of frustration</li> <li>• Social division</li> <li>• Prostitution and drugs</li> </ul>                             |

doi:10.1371/journal.pone.0166919.t002

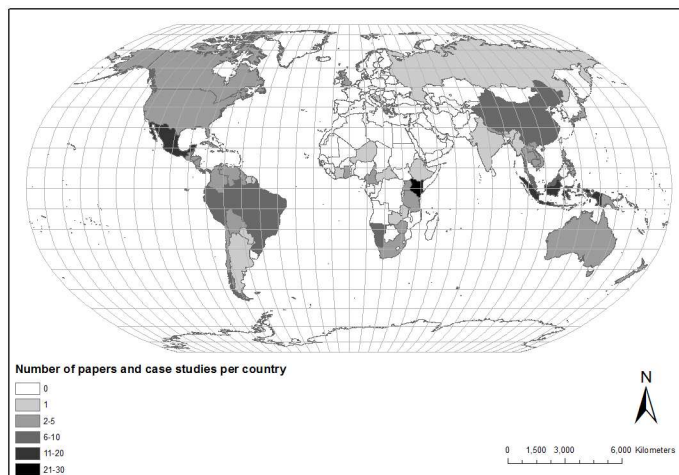

**Fig 2. Geographical distribution of case studies.** Map created using ArcGIS® ([www.esri.com](http://www.esri.com)). Published with permission from Esri, under CCAL CC BY 4.0 (<http://creativecommons.org/licenses/by/4.0/>). Data from this study.

doi:10.1371/journal.pone.0166919.g002

conservation rather than enhancing it: e.g., where ecotourism incomes were used for environmentally damaging purchases such as expansion of cattle herds.

### 3.7 Regional signatures

The geographic focus of previous literature is mapped in Fig 2, which contains all the specific cases from S3 and S4 Tables, and the country-specific analyses from S2 Table. Of the 214 specific cases, most (190 studies, 89%) are from developing countries, with a much smaller proportion (24, 11%) from developed countries. Most cases (196, 91%) are located inside protected areas. There is a strong association ( $p < 0.001$ ) between category and geographic region. In Latin America and Asia, higher proportions of projects were initiated either by NGOs or local communities (categories 3 and 7), whereas in Africa, a higher proportion were initiated by private tour operators (category 9). That is, the predicted regional signatures do indeed exist.

### 3.8 Success factors

Contrary to predictions and suggestions by previous authors [23, 34, 60, 62–65], at global scale we found that the proportions of successful projects is not significantly higher for those led by private operators (category 9) than for those led by other stakeholders ( $p = 0.52$ , Fisher's Exact Test, one-tailed). Whilst many successful private sector conservation tourism projects have indeed been established in Africa during the historical period covered by this analysis (37), only a few involve NGOs (S3 and S4 Tables). In addition, some which do include NGOs have shown limited success [26, 28, 29, 117].

Also contrary to previous suggestions and predictions [32, 66–70], we found that the proportion of successful projects is significantly lower ( $p = 0.0049$ ) for those which involve international and local NGO's working jointly, than for those which are operated by a single NGO, either local or international.

## 4. Discussion

This analysis provides the first global-scale review of the role of NGOs in ecotourism. It complements previous reviews of ecotourism in private conservation reserves, communal

conservancies, and public protected areas [38, 124]. There are two potential limitations in the scope of projects examined. The first relates to language. Cases from countries such as India, Russia, China or Brazil may be under-represented if they were published in languages other than English or Spanish, unless journals included English titles and abstracts, and are indexed internationally. In practice we identified cases from >70 countries, so it appears that the language limitation is minimal. The second relates to possible publication bias. Case-study authors who report on single-NGO projects may possibly have connections with the NGO's concerned, and may therefore select more successful projects to report.

This analysis shows that NGOs do indeed play a significant role worldwide in the use of ecotourism for conservation, particularly through community-based approaches associated with protected areas in developing countries. It demonstrates that: there are multiple different mechanisms by which NGOs may become involved in ecotourism initiatives intended to benefit conservation; different NGOs may prefer different approaches; the historical frequencies of different approaches, involving different stakeholders, have differed between continents; and these frequencies may currently be changing, so as to bring greater coherence in practices worldwide. These findings indicate that the paucity of knowledge on the role of NGOs represents a significant gap in current research on ecotourism, community-based tourism and conservation tourism, and merits greater attention.

This analysis also confirms the importance of the relationships between stakeholders for project structure. The stakeholder that first proposes or establishes each new ecotourism project seems to become dominant in determining its initial goals, design, structure, governance and management. Projects proposed by NGOs adopt different management structures and different NGO roles, from projects proposed or established by local communities, private tour operators, or government agencies. This applies even if all the same stakeholders are involved. Some NGOs may later expand or change their roles, even in projects that they did not initiate. Since this may affect project outcomes, it would be valuable to examine in detail what factors promote such flexibility.

The high proportion of cases in developing countries suggests that in these countries, rather than relying on national governments, NGOs endeavour to undertake conservation activities directly, including community engagement and revenue generation through ecotourism [41, 42, 60]. This parallels the approach taken by development NGOs in using tourism for poverty alleviation [23, 43, 57, 60]. In developed nations, where government agencies have more powerful executive functions, NGOs seem to focus instead on political lobbying and formal submissions to public consultation processes [41, 42].

The preponderance of privately-driven projects in Africa, and NGO and community-driven projects in Latin America and Asia, for example, may reflect political histories [78, 97, 125]. In particular, some Asian and Latin American nations have past or present governments whose political ideologies may have created barriers to private sector involvement. In countries such as China, however, this is now changing rapidly, with public-private partnerships widespread for tourism infrastructure in national parks and forests [126]. Some African nations have stable governments and a long history of safari tourism and game lodges, allowing tourism operators to form partnerships directly with local communities [38]. It is also possible that in Latin America and Asia, the use of ecotourism in conservation was started historically by NGO's, with later involvement by the private sector; whereas in Africa, it was started by private operators, with NGOs becoming involved only recently.

Our analysis shows that historically and at global scale, collaboration between the private tourism sector and NGOs has not increased the proportion of successful ecotourism projects. It also indicates that the proportion of successful projects is greater for NGOs working individually than for those collaborating with other NGOs. There are however, two caveats. The first is lack

of detail on the roles adopted by different stakeholders. The second is that local-scale patterns may be masked at global scale. Finer-scale research could examine: how stakeholder perceptions of each other influence partnerships [41]; conflicts between the goals of international and local NGOs [22, 127]; and what drives competing NGOs to cooperate with each other, or not [41]. Some authors, for example [34, 54, 56, 65], have argued that international NGOs have used ecotourism to promote neoliberal political agendas which do not necessarily reflect local concerns.

This analysis reveals that tangible contributions to conservation are rarely quantified in any reliable manner. For example, very few of these 214 studies have measured or reported: contributions to the viability of threatened species populations [128–131]; increases in the number of individuals or area of habitat protected, for threatened species; or reductions in poaching, hunting harvesting, livestock pasturing and land clearing. More accurate and reliable metrics are needed evaluate the environmental outcomes of ecotourism projects involving NGOs. For many projects, NGOs did not articulate conservation goals, nor how they expected to achieve them. Some NGOs may be driven by a desire to conserve particular species, ecosystems or areas; but others by the availability of funding [29, 42].

Improved evaluation of environmental, sociocultural and economic outcomes, and factors contributing to the success or failure of individual projects, is increasingly important as aggregate global investment in ecotourism by NGOs and their donors is now in the tens or hundreds of millions of dollars across the globe [23, 47, 63, 81, 82, 87, 105, 132–136], and investors expect accountability and efficient allocation of resources [34, 137]. Numerous authors have proposed parameters, criteria or approaches to measure the success or failure of individual ecotourism projects [32, 105, 128, 138–142]. It would be valuable to combine or select from these parameters and criteria, and to test them robustly, so as to develop metrics widely applicable under changing global, national, local and internal factors shaping dynamics of the NGOs involved.

The global framework and meta-analysis presented here provides a robust, comprehensive and coherent picture of patterns at global and continental scales, but a coarse-grained one. Many of the individual case studies cited here did provide detailed analyses, but at single-site scales. The more general of the previously published studies identified broad issues and discourses, but with limited detail. We suggest, therefore, that the next step in analysing the use of ecotourism as a conservation tool by NGOs, and the role of NGOs in conservation tourism projects, should be to identify drivers, decision-making processes, designs, and management strategies used across suites of similar initiatives in individual nations or otherwise similar social, political and historical frameworks. We suggest that a political ecology framework could be used to examine how historical processes, cultural factors, actors, institutions and biophysical environments [143–146] combine to determine the drivers and shape the structures and outcomes of ecotourism projects involving NGOs.

In particular, it is noteworthy that whilst four fifths of these cases involved local communities, only one fifth were initiated by these communities. That is, most community-based conservation ecotourism projects are initiated by NGOs. Therefore, the processes which determine how NGOs select and define these initiatives are key in the use of ecotourism in conservation and community development, and deserve future research attention.

## Supporting Information

### S1 Table. PRISMA Checklist.

(DOC)

### S2 Table. Publications examining the broad roles and approaches of NGOs in ecotourism.

(DOCX)

**S3 Table. Publications describing individual NGO-based ecotourism case studies.**  
(DOCX)

**S4 Table. Case studies from three compendia (Buckley, 2003, Buckley, 2010, Zeppel, 2006).**  
(DOCX)

## Acknowledgments

We thank Fernanda de Vasconcellos Pegas for valuable discussion in the early stages of this research.

## Author Contributions

**Conceptualization:** TPRB RCB.

**Data curation:** TPRB.

**Formal analysis:** TPRB RCB.

**Funding acquisition:** TPRB RCB.

**Investigation:** TPRB.

**Methodology:** TPRB RCB JB.

**Project administration:** TPRB RCB JB.

**Resources:** TPRB RCB.

**Software:** TPRB.

**Supervision:** RCB JB.

**Validation:** RCB JB.

**Visualization:** TPRB RCB JB.

**Writing – original draft:** TPRB RCB JB.

**Writing – review & editing:** RCB.

## References

1. Barnosky AD, Matzke N, Tomiya S, Wogan GO, Swartz B, Quental TB, et al. Has the Earth's sixth mass extinction already arrived? *Nature*. 2011; 471(7336):51–7. doi: [10.1038/nature09678](https://doi.org/10.1038/nature09678) PMID: [21368823](https://pubmed.ncbi.nlm.nih.gov/21368823/)
2. Butchart SH, Walpole M, Collen B, van Strien A, Scharlemann JP, Almond RE, et al. Global biodiversity: indicators of recent declines. *Science*. 2010; 328(5982):1164–8. doi: [10.1126/science.1187512](https://doi.org/10.1126/science.1187512) PMID: [20430971](https://pubmed.ncbi.nlm.nih.gov/20430971/)
3. Di Minin E, Hunter LT, Balme GA, Smith RJ, Goodman PS, Slotow R. Creating larger and better connected protected areas enhances the persistence of big game species in the Maputaland-Pondoland-Albany biodiversity hotspot. *PLoS One*. 2013; 8(8):e71788. doi: [10.1371/journal.pone.0071788](https://doi.org/10.1371/journal.pone.0071788) PMID: [23977144](https://pubmed.ncbi.nlm.nih.gov/23977144/)
4. Hoffmann M, Hilton-Taylor C, Angulo A, Böhm M, Brooks TM, Butchart SH, et al. The impact of conservation on the status of the world's vertebrates. *Science*. 2010; 330(6010):1503–9. doi: [10.1126/science.1194442](https://doi.org/10.1126/science.1194442) PMID: [20978281](https://pubmed.ncbi.nlm.nih.gov/20978281/)
5. Le Saout S, Hoffmann M, Shi Y, Hughes A, Bernard C, Brooks TM, et al. Protected areas and effective biodiversity conservation. *Science*. 2013; 342(6160):803–5. doi: [10.1126/science.1239268](https://doi.org/10.1126/science.1239268) PMID: [24233709](https://pubmed.ncbi.nlm.nih.gov/24233709/)

6. Pereira HM, Leadley PW, Proença V, Alkemade R, Scharlemann JP, Fernandez-Manjarrés JF, et al. Scenarios for global biodiversity in the 21st century. *Science*. 2010; 330(6010):1496–501. doi: [10.1126/science.1196624](https://doi.org/10.1126/science.1196624) PMID: [20978282](https://pubmed.ncbi.nlm.nih.gov/20978282/)
7. Perrings C, Duraiappah A, Larigauderie A, Mooney H. The Biodiversity and Ecosystem Services Science-Policy Interface. *Science*. 2011; 331(6021):1139–40. doi: [10.1126/science.1202400](https://doi.org/10.1126/science.1202400) PMID: [21330488](https://pubmed.ncbi.nlm.nih.gov/21330488/)
8. Pimm S, Jenkins C, Abell R, Brooks T, Gittleman J, Joppa L, et al. The biodiversity of species and their rates of extinction, distribution, and protection. *Science*. 2014; 344(6187):1246752. doi: [10.1126/science.1246752](https://doi.org/10.1126/science.1246752) PMID: [24876501](https://pubmed.ncbi.nlm.nih.gov/24876501/)
9. Ripple WJ, Estes JA, Beschta RL, Wilmers CC, Ritchie EG, Hebblewhite M, et al. Status and ecological effects of the world's largest carnivores. *Science*. 2014; 343(6167):1241484. doi: [10.1126/science.1241484](https://doi.org/10.1126/science.1241484) PMID: [24408439](https://pubmed.ncbi.nlm.nih.gov/24408439/)
10. Säterberg T, Sellman S, Ebenman B. High frequency of functional extinctions in ecological networks. *Nature*. 2013; 499(7459):468–70. doi: [10.1038/nature12277](https://doi.org/10.1038/nature12277) PMID: [23831648](https://pubmed.ncbi.nlm.nih.gov/23831648/)
11. Waldron A, Mooers AO, Miller DC, Nibbelink N, Redding D, Kuhn TS, et al. Targeting global conservation funding to limit immediate biodiversity declines. *Proceedings of the National Academy of Sciences*. 2013; 110(29):12144–8.
12. Barnosky AD, Hadly EA, Bascompte J, Berlow EL, Brown JH, Fortelius M, et al. Approaching a state shift in Earth's biosphere. *Nature*. 2012; 486(7401):52–8. doi: [10.1038/nature11018](https://doi.org/10.1038/nature11018) PMID: [22678279](https://pubmed.ncbi.nlm.nih.gov/22678279/)
13. Balmford A. *Wild Hope: On the Front Lines of Conservation Success*. University of Chicago Press; 2012.
14. Buckley RC, Pabla H. Conservation: Tourism ban won't help Indian tigers. *Nature*. 2012; 489(7414):33–.
15. Ferraro PJ, Hanauer MM. Quantifying causal mechanisms to determine how protected areas affect poverty through changes in ecosystem services and infrastructure. *Proceedings of the National Academy of Sciences*. 2014; 111(11):4332–7.
16. Karanth KK, DeFries R. Conservation and management in human-dominated landscapes: case studies from India. *Biological Conservation*. 2010; 143(12):2865–9.
17. McCarthy DP, Donald PF, Scharlemann JP, Buchanan GM, Balmford A, Green JM, et al. Financial costs of meeting global biodiversity conservation targets: current spending and unmet needs. *Science*. 2012; 338(6109):946–9. doi: [10.1126/science.1229803](https://doi.org/10.1126/science.1229803) PMID: [23065904](https://pubmed.ncbi.nlm.nih.gov/23065904/)
18. Schwitzer C, Mittermeier RA, Johnson SE, Donati G, Irwin M, Peacock H, et al. Averting lemur extinctions amid Madagascar's political crisis. *Science*. 2014; (343):842–3.
19. Buckley R, de Vasconcellos Pegas F. Conserving Brazil's Atlantic forests. *Science*. 2014; 346:1193–.
20. Ebrahim A. *NGOs and organizational change: discourse, reporting, and learning*. Cambridge: Cambridge University Press; 2005.
21. Fowler A, Malunga CW. *NGO management: the Earthscan companion*. Washington, DC; London: Earthscan; 2010.
22. Scheyvens R. *Tourism for development: Empowering communities*. Pearson Education; 2002.
23. Kennedy K, Dornan DA. An overview: Tourism non-governmental organizations and poverty reduction in developing countries. *Asia Pacific Journal of Tourism Research*. 2009; 14(2):183–200.
24. Ong F, Pearlman M, Lockstone-Binney L. An examination of not-for-profit volunteer tourism sending organisations' guiding considerations that influence volunteer tourism programmes. *World Leisure Journal*. 2011; 53(4):296–311.
25. Pellis A, Van der Duim V, Meyer D, Saarinen J, Zellmer K. Modern and traditional arrangements in community-based tourism: Exploring an election conflict in the Anabeb conservancy, Namibia. *New alliances for tourism, conservation and development in Eastern and Southern Africa*. 2011:127–46.
26. Ahebwa WM, Van der Duim VR, Sandbrook CG. Private-community partnerships: Investigating a new approach to conservation and development in Uganda. *Conservation and Society*. 2012; 10(4):305.
27. Lamers M, van der Duim R, van Wijk J, Nthiga R, Visseren-Hamakers IJ. Governing conservation tourism partnerships in Kenya. *Annals of Tourism Research*. 2014; 48:250–65.
28. Lamers M, van der Duim R, Nthiga R, van Wijk J, Waterreus S. Implementing Tourism-Conservation Enterprises: A Comparison of Three Lodges in Kenya. *Institutional Arrangements for Conservation, Development and Tourism in Eastern and Southern Africa*. Springer; 2015. p. 219–38.
29. van Wijk J, van der Duim R, Lamers M, Sumba D. The emergence of institutional innovations in tourism: the evolution of the African Wildlife Foundation's tourism conservation enterprises. *Journal of Sustainable Tourism*. 2015; 23(1):104–25.



30. van Wijk J, Lamers M, van der Duim R. Promoting Conservation Tourism: The Case of the African Wildlife Foundation's Tourism Conservation Enterprises in Kenya. *Institutional Arrangements for Conservation, Development and Tourism in Eastern and Southern Africa*: Springer; 2015. p. 203–18.
31. Butcher J. *Ecotourism, NGOs and development: a critical analysis*. New York: Routledge; 2007.
32. Jamal T, Kreuter U, Yanosky A. Bridging organisations for sustainable development and conservation: a Paraguayan case. *International Journal of Tourism Policy*. 2007; 1(2):93–110.
33. Wood ME. The ecotourism society-an international NGO committed to sustainable development. *Tourism Recreation Research*. 1999; 24(2):119–23.
34. Simpson MC. Community benefit tourism initiatives: a conceptual oxymoron? *Tourism Management*. 2008; 29(1):1–18.
35. Hoole AF. Place-power-prognosis: Community-based conservation, partnerships, and ecotourism enterprises in Namibia. *International Journal of the Commons*. 2009; 4(1):78–99.
36. Karkut J. Bosnian NGOs and tourism: grassroots, spires and minarets. *Tourism Recreation Research*. 1999; 24(2):45–9.
37. Buckley R. *Case studies in ecotourism*: Wallingford: CABI Publishing; 2003.
38. Buckley R. *Conservation tourism*: Wallingford: CABI Publishing; 2010.
39. Buckley R. Tourism and environment. *Annual Review of Environment and Resources*. 2011; 36:397–416.
40. Lovelock B. Why it's good to be bad: the role of conflict in contributing towards sustainable tourism in protected areas. *Journal of Sustainable Tourism*. 2002; 10(1):5–30.
41. Lovelock B. A comparative study of environmental NGOs' perspectives of the tourism industry and modes of action in the South and South-East Asia and Oceania regions. *Asia Pacific Journal of Tourism Research*. 2003; 8(1):1–14.
42. Lovelock B. Tea-sippers or arsonists? Environmental NGOs and their responses to protected area tourism: A study of the Royal Forest and Bird Protection Society of New Zealand. *Journal of Sustainable Tourism*. 2005; 13(6):529–45.
43. Barnett T. Influencing Tourism at the Grassroots Level: the role of ngo Tourism Concern. *Third World Quarterly*. 2008; 29(5):995–1002.
44. Trejos B, Chiang LHN, Huang WC. Support networks for community-based tourism in rural Costa Rica. *The Open Area Studies Journal*. 2008; 1:16–25.
45. Trejos B, Huang WC, Chiang LHN. The Role of NGOs in the Development of Community-Based Rural Tourism in Costa Rica. *Journal of Rural Tourism Research*. 2008; 2:63–76.
46. Wearing S, McDonald M, Ponting J. Building a Decommodified Research Paradigm in Tourism: The Contribution of NGOs. *Journal of Sustainable Tourism*. 2005; 13(5):424–39.
47. Zeppel H. *Indigenous ecotourism: Sustainable development and management*: Wallingford. CAB International; 2006.
48. Warren C. Mapping common futures: customary communities, NGOs and the state in Indonesia's reform era. *Development and Change*. 2005; 36(1):49–73.
49. Cousins J. The role of UK-based conservation tourism operators. *Tourism Management*. 2007; 28(4):1020–30.
50. Singh S. On tourism in Goa-NGOs can make a difference. *Tourism Recreation Research*. 1999; 24(2):92–4.
51. Schelhaas M, Bushell R, Eagles P, editors. *Sustainable Nature Tourism in Europe: An Overview of NGOs. Tourism and protected areas: benefits beyond boundaries 2007*: CABI.
52. Raymond E. Make a difference! the role of sending organizations in volunteer tourism. *Journeys of Discovery in Volunteer Tourism: International Case Study Perspectives*. 2008:48–60.
53. Spencer R. Lessons from Cuba: A volunteer army of ambassadors. *Journeys of Discovery in Volunteer Tourism: International Case Study Perspectives*. 2008:36–47.
54. Sundberg J. NGO Landscapes in the Maya Biosphere Reserve, Guatemala. *Geographical Review*. 1998; 88(3):388–412.
55. Valcuende del Río J, Quispe C. Tourism, local communities and NGOs: a case study in Madre de Dios (Peru). *PASOS: Revista de Turismo y Patrimonio Cultural*. 2009; 7(2):179–96.
56. Neves K. Cashing in on Cetourism: A Critical Ecological Engagement with Dominant E-NGO Discourses on Whaling, Cetacean Conservation, and Whale Watching. *Antipode*. 2010; 42(3):719–.
57. Hummel J, van der Duim R. Tourism and development at work: 15 years of tourism and poverty reduction within the SNV Netherlands Development Organisation. *Journal of Sustainable Tourism*. 2012; 20(3):319–38.

58. Sithole E. Trans-boundary environmental actors: the Zambezi Society's campaign for sustainable tourism development in the Zambezi Bioregion. *Journal of Sustainable Tourism*. 2005; 13(5):486–503.
59. Manyara G, Jones E, Botterill D. Tourism and poverty alleviation: the case for indigenous enterprise development in Kenya. *Tourism Culture & Communication*. 2006; 7(1):19–37.
60. Harrison D, Schipani S. Lao tourism and poverty alleviation: Community-based tourism and the private sector. *Current Issues in Tourism*. 2007; 10(2–3):194–230.
61. Wood ME. Meeting the global challenge of community participation in ecotourism: Case studies and lessons from Ecuador: Latin America and Caribbean Division, Nature Conservancy; 1998.
62. Ashley C, Ntshona ZM. Transforming Roles But Not Reality?: Private Sector and Community Involvement in Tourism and Forestry Development on the Wild Coast, South Africa: Sustainable Livelihoods in Southern Africa Programme, University of Sussex; 2003.
63. Heher S. Ecotourism Investment and Development Models: Donors, NGOs and Private Entrepreneurs. Cornell University. 2003.
64. Snyman S. Ecotourism joint ventures between the private sector and communities: An updated analysis of the Torra Conservancy and Damaraland Camp partnership, Namibia. *Tourism Management Perspectives*. 2012; 4:127–35.
65. Wearing S, McDonald M. The Development of Community-based Tourism: Re-thinking the Relationship Between Tour Operators and Development Agents as Intermediaries in Rural and Isolated Area Communities. *Journal of Sustainable Tourism*. 2002; 10(3):191–206.
66. Bratton M. Non-governmental Organizations in Africa: Can They Influence Public Policy? *Development and Change*. 1990; 21(1):87–118.
67. Princen T, Finger M. *Environmental NGOs in world politics*: Routledge; 1994.
68. Cooley A, Ron J. The NGO scramble: Organizational insecurity and the political economy of transnational action. *International Security*. 2002; 27(1):5–39.
69. Mahanty S. NGOs, Agencies and Donors in Participatory Conservation: Tales from Nagarhole. *Economic and Political Weekly*. 2002:3757–65.
70. Mahanty S. Conservation and development interventions as networks: the case of the India Ecocodevelopment Project, Karnataka. *World Development*. 2002; 30(8):1369–86.
71. Moher D, Liberati A, Tetzlaff J, Altman DG, The PG. Preferred Reporting Items for Systematic Reviews and Meta-Analyses: The PRISMA Statement. *PLoS Med*. 2009; 6(7):e1000097. doi: [10.1371/journal.pmed.1000097](https://doi.org/10.1371/journal.pmed.1000097) PMID: [19621072](https://pubmed.ncbi.nlm.nih.gov/19621072/)
72. Shamseer L, Moher D, Clarke M, Ghersi D. Preferred reporting items for systematic review and meta-analysis protocols (PRISMA-P) 2015: elaboration and explanation. *BMJ British medical journal (Clinical research ed)*. 2015; 349:g7647.
73. Silverman D. *Qualitative Research*: SAGE Publications; 2010. doi: [10.1177/1468794110362874](https://doi.org/10.1177/1468794110362874)
74. Punch KF. *Introduction to Social Research: Quantitative and Qualitative Approaches*: SAGE Publications; 2013.
75. Azcarate MC. Contentious hotspots: Ecotourism and the restructuring of place at the Biosphere Reserve Ria Celestun (Yucatan, Mexico). *Tourist Studies*. 2010; 10(2):99–116.
76. Balint PJ. Improving community-based conservation near protected areas: the importance of development variables. *Environmental Management*. 2006; 38(1):137–48. doi: [10.1007/s00267-005-0100-y](https://doi.org/10.1007/s00267-005-0100-y) PMID: [16738825](https://pubmed.ncbi.nlm.nih.gov/16738825/)
77. Baral N, Stern MJ. A comparative study of two community-based conservation models in Nepal. *Biodiversity and Conservation*. 2011; 20(11):2407–26.
78. Barkin D. Alleviating poverty through ecotourism: Promises and reality in the Monarch Butterfly Reserve of Mexico. *Environment, Development and Sustainability*. 2003; 5(3):371–82.
79. Barkin D, Bouchez CP. NGO-Community Collaboration for Ecotourism: A Strategy for Sustainable Regional Development. *Current Issues in Tourism*. 2002; 5(3):245–53.
80. Brenner L, Job H. Actor-oriented management of protected areas and ecotourism in Mexico. *Journal of Latin American Geography*. 2006:7–27.
81. Brightsmith DJ, Stronza A, Holle K. Ecotourism, conservation biology, and volunteer tourism: A mutually beneficial triumvirate. *Biological Conservation*. 2008; 141(11):2832–42.
82. Brightsmith DJ. Rainforest expeditions and Earthwatch as funding partners for Macaw (*Ara spp.*) research in southeastern Peru. *Neotropical Ornithology*. 2008; 19:173–81.
83. Cusack D, Dixon L. Community-based ecotourism and sustainability: Cases in Bocas del Toro Province, Panama and Talamanca, Costa Rica. *Journal of Sustainable Forestry*. 2006; 22(1–2):157–82.

84. de los Angeles Somarriba-Chang M, Gunnarsdotter Y. Local community participation in ecotourism and conservation issues in two nature reserves in Nicaragua. *Journal of Sustainable Tourism*. 2012; 20(8):1025–43.
85. Foucat VSA. Community-based ecotourism management moving towards sustainability, in Ventanilla, Oaxaca, Mexico. *Ocean and Coastal Management*. 2002; 45(8):511–29.
86. Gray NJ, Campbell LM. A decommodified experience? Exploring aesthetic, economic and ethical values for volunteer ecotourism in Costa Rica. *Journal of Sustainable Tourism*. 2007; 15(5):463–82.
87. Halpenny EA. Ecotourism-related Organizations. *The encyclopedia of ecotourism*. 2001:479.
88. Halpenny EA. NGOs as conservation agents: Achieving conservation through marine ecotourism. *Marine ecotourism: issues and experience* Channel View Publications, Clevedon. 2003:107–21.
89. Hamzah A, Mohamad NH. Critical success factors of community based ecotourism: case study of Miso Walai Homestay Kinabatangan, Sabah. *The Malaysian Forester*. 2012; 75(1):29–42.
90. Hitchner SL, Apu FL, Tarawe L, Galih@ Sinah Nabun Aran S, Yesaya E. Community-based trans-boundary ecotourism in the heart of Borneo: a case study of the Kelabit Highlands of Malaysia and the Kerayan Highlands of Indonesia. *Journal of Ecotourism*. 2009; 8(2):193–213.
91. Hiwasaki L. Community-based tourism: A pathway to sustainability for Japan's protected areas. *Society and Natural Resources*. 2006; 19(8):675–92.
92. Horochowski K, Moisey R. The role of environmental NGOs in sustainable tourism development: a case study in northern Honduras. *Tourism Recreation Research*. 1999; 24(2):19–29.
93. Hummel J, Gujadhur T, Ritsma N. Evolution of Tourism Approaches for Poverty Reduction Impact in SNV Asia: Cases from Lao PDR, Bhutan and Vietnam. *Asia Pacific Journal of Tourism Research*. 2012; 1:1–16.
94. Jamal T, Stronza A. Collaboration theory and tourism practice in protected areas: stakeholders, structuring and sustainability. *Journal of Sustainable Tourism*. 2009; 17(2):169–89.
95. Lapeyre R. Community-based tourism as a sustainable solution to maximise impacts locally? The Tsi-seb Conservancy case, Namibia. *Development Southern Africa*. 2010; 27(5):757–72.
96. Liburd JJ. NGOs in tourism and preservation: democratic accountability and sustainability in question. *Tourism Recreation Research*. 2004; 29(2):105–9.
97. McAlpin M. Conservation and community-based development through ecotourism in the temperate rainforest of southern Chile. *Policy Sciences*. 2008; 41(1):51–69.
98. Novelli M, Gebhardt K. Community based tourism in Namibia: 'Reality show' or 'window dressing'? *Current Issues in Tourism*. 2007; 10(5):443–79.
99. Ohi-Schacherer J, Mannigel E, Kirkby C, Shepard G, Yu D. Indigenous ecotourism in the Amazon: a case study of 'Casa Matsigenka' in Manu National Park, Peru. *Environmental Conservation*. 2008; 35(1):14–25.
100. Pegas F, Stronza A. Ecotourism and sea turtle harvesting in a fishing village of Bahia, Brazil. *Conservation & Society*. 2010; 8:15–25.
101. Reimer JK, Walter P. How do you know it when you see it?: community-based ecotourism in the Cardamom Mountains of southwestern Cambodia. *Tourism Management*. 2013; 34:122–32.
102. Segrado R, Farmer F. The impact of local NGOs on sustainable tourism in Valle de Bravo, Mexico. *Sustainable Tourism II*, WIT Press, Southampton, UK. 2006:311–8.
103. Sparrowhawk J, Holden A. Human development: the role of tourism based NGOs in Nepal. *Tourism Recreation Research*. 1999; 24(2):37–43.
104. Spencer R. *Development tourism: lessons from Cuba*: Ashgate Publishing Company; 2010.
105. Stronza A, Pegas F. Ecotourism and Conservation: Two Cases from Brazil and Peru. *Human Dimensions of Wildlife*. 2008; 13:263–79.
106. Svoronou E, Holden A. Ecotourism as a tool for nature conservation: the role of WWF Greece in the Dadia-Lefkimi-Soufli Forest Reserve in Greece. *Journal of Sustainable Tourism*. 2005; 13(5):456–67.
107. Timothy DJ, White K. Community-based ecotourism development on the periphery of Belize. *Current Issues in Tourism*. 1999; 2(2–3):226–42.
108. Trejos B, Chiang LHN. Local economic linkages to community-based tourism in rural Costa Rica. *Singapore journal of tropical geography*. 2009; 30(3):373–87.
109. Walter P. Local knowledge and adult learning in environmental adult education: community-based ecotourism in southern Thailand. *International Journal of lifelong education*. 2009; 28(4):513–32.
110. Walter PG, Reimer J. The "Ecotourism curriculum" and visitor learning in community-based ecotourism: case studies from Thailand and Cambodia. *Asia Pacific Journal of Tourism Research*. 2012; 17(5):551–61.

111. West P, Carrier J. Ecotourism and authenticity: Getting away from it all? *Current Anthropology*. 2004; 45(4):483–98.
112. Zanotti L, Chernela J. Conflicting cultures of nature: ecotourism, education and the Kayapó of the Brazilian Amazon. *Tourism Geographies*. 2008; 10(4):495–521.
113. Zapata MJ, Hall CM, Lindo P, Vanderschaeghe M. Can community-based tourism contribute to development and poverty alleviation? Lessons from Nicaragua. *Current Issues in Tourism*. 2011; 14(8):725–49.
114. Zhuang H, Lassoie JP, Wolf SA. Ecotourism development in China: prospects for expanded roles for non-governmental organisations. *Journal of Ecotourism*. 2011; 10(1):46–63.
115. Nthiga R, Mwongela B, Zellmer K. Conservation through tourism: The conservation enterprise model of the African Wildlife Foundation. *New alliances for tourism, conservation and development in Eastern and Southern Africa*. 2011:107–26.
116. Nthiga R, Van der Duim R, Visseren-Hamakers IJ, Lamers M. Tourism-conservation enterprises for community livelihoods and biodiversity conservation in Kenya. *Development Southern Africa*. 2015; 32(3):407–23.
117. Lamers M, Nthiga R, van der Duim R, van Wijk J. Tourism–conservation enterprises as a land-use strategy in Kenya. *Tourism Geographies*. 2014; 16(3):474–89.
118. Nyakaana J, Ahebwa W. Governance of Community-Based Tourism in Uganda: An analysis of the Kibale Association for Rural and Environmental Development (KAFRED). *New alliances for tourism, conservation and development in Eastern and Southern Africa*: Eburon; 2011. p. 63–81.
119. van der Duim R, Ampumaza C, Ahebwa WM. Gorilla Tourism in Bwindi Impenetrable National Park, Uganda: An Actor-Network Perspective. *Society & Natural Resources*. 2014; 27(6):588–601.
120. Ndlovu J, Utete O, Kimaro ME. Defying Extinction Through Conservation: Benefits of Black Rhino Tracking in the# Khoadi/Hôas Conservancy, Namibia. *J Hum Ecol*. 2014; 47(3):229–39.
121. Balint PJ, Mashinya J. The decline of a model community-based conservation project: Governance, capacity, and devolution in Mahenye, Zimbabwe. *Geoforum*. 2006; 37(5):805–15.
122. Finnetty S. Analyzing the roles of local non-governmental organizations (NGOs) in sustainable tourism: A case study of Belize, Central America. Master dissertation Wilfrid Laurier University. 2001.
123. Ntshona ZM, Lahiff E. Community-based eco-tourism on the Wild Coast, South Africa: the case of the Amadiba Trail: University of Sussex, Institute of Development Studies, Sustainable Livelihoods in Southern Africa Programme; 2003.
124. Leung Y, Spenceley A, Hvenegaard G, Buckley R. Tourism and Visitor Management in Protected Areas. 2015.
125. Pasquini L, Fitzsimons JA, Cowell S, Brandon K, Wescott G. The establishment of large private nature reserves by conservation NGOs: key factors for successful implementation. *ORYX*. 2011; 45(3):373–80.
126. Zhong L, Buckley RC, Wardle C, Wang L. Environmental and visitor management in a thousand protected areas in China. *Biological Conservation*. 2015; 181:219–25.
127. Mohan G. The disappointments of civil society: the politics of NGO intervention in northern Ghana. *Political Geography*. 2002; 21(1):125–54.
128. Buckley R. Evaluating the net effects of ecotourism on the environment: a framework, first assessment and future research. *Journal of Sustainable Tourism*. 2009; 17(6):643–72.
129. Buckley RC, Castley JG, de Vasconcellos Pegas F, Mossaz AC, Steven R. A Population Accounting Approach to Assess Tourism Contributions to Conservation of IUCN-Redlisted Mammal Species. *PLoS One*. 2012; 7(9):e44134. doi: [10.1371/journal.pone.0044134](https://doi.org/10.1371/journal.pone.0044134) PMID: [22984467](https://pubmed.ncbi.nlm.nih.gov/22984467/)
130. Morrison C, Simpkins C, Castley JG, Buckley RC. Tourism and the conservation of critically endangered frogs. *PLoS One*. 2012; 7(9):e43757. doi: [10.1371/journal.pone.0043757](https://doi.org/10.1371/journal.pone.0043757) PMID: [22984440](https://pubmed.ncbi.nlm.nih.gov/22984440/)
131. Steven R, Castley JG, Buckley R. Tourism revenue as a conservation tool for threatened birds in protected areas. *PLoS One*. 2013; 8(5):e62598. doi: [10.1371/journal.pone.0062598](https://doi.org/10.1371/journal.pone.0062598) PMID: [23667498](https://pubmed.ncbi.nlm.nih.gov/23667498/)
132. Weaver DB, Lawton LJ. Twenty years on: The state of contemporary ecotourism research. *Tourism Management*. 2007; 28(5):1168–79.
133. WWF. Travel with WWF 2015. <https://www.worldwildlife.org/travel>.
134. TNC. Travel: connect with the Natural World 2015. <http://www.nature.org/greenliving/greenshopping/travel/>.
135. CI. Verde Ventures: Investing in sustainable business 2015. <http://www.conservation.org/projects/Pages/Verde-Ventures.aspx>.

136. GEF. GEF and GEF SGP fund bird conservation project that promotes eco-tourism and craft initiatives 2012. <https://www.thegef.org/gef/news/gef-and-gef-sgp-fund-conservation-mutulanganga-important-bird-area-promoting-community-managed->.
137. Jepson P. Governance and accountability of environmental NGOs. *Environmental Science & Policy*. 2005; 8(5):515–24.
138. Sirakaya E, Jamal TB, Choi H-S. Developing indicators for destination sustainability. *The encyclopedia of ecotourism*. 2001:411–32.
139. Halstead L. Making Community-based Tourism Work: An Assessment of Factors Contributing to Successful Community Owned Tourism Development in Caprivi, Namibia: Directorate of Environmental Affairs, Ministry of Environment and Tourism; 2003.
140. Ko TG. Development of a tourism sustainability assessment procedure: a conceptual approach. *Tourism Management*. 2005; 26(3):431–45.
141. Krüger O. The role of ecotourism in conservation: panacea or Pandora's box? *Biodiversity and Conservation*. 2005; 14(3):579–600.
142. Buckley R. *Ecotourism: Principles and practices*: Wallingford: CABI Publishing; 2009.
143. King DA, Stewart WP. Ecotourism and commodification: protecting people and places. *Biodiversity & Conservation*. 1996; 5(3):293–305.
144. Belsky JM. Misrepresenting Communities: The Politics of Community-Based Rural Ecotourism in Gales Point Manatee, Belize1. *Rural Sociology*. 1999; 64(4):641–66.
145. Coria J, Calfucura E. Ecotourism and the development of indigenous communities: The good, the bad, and the ugly. *Ecological Economics*. 2012; 73:47–55.
146. Celata F, Sanna VS. The post-political ecology of protected areas: nature, social justice and political conflicts in the Galápagos Islands. *Local Environment*. 2012; 17(9):977–90.
